# Supplementary material
Source: MDPI journal article supplement (https://www.mdpi.com/search?q=ijerph-17-02336)
Supplement: s001 [file ijerph-17-02336-s001.pdf]

# Environmental distribution of AR Class 1 integrons in upper Adige river catchment (Italy)

Federica Piergiacomo · Luigimaria Borruso · Stefano Rizzi · Stefan Zerbe · Lorenzo Brusetti

Faculty of Science and Technology, Free University of Bolzano-Bozen, Piazza Università 1, 39100 Bolzano-Bozen, Italy

## 1. Description of sampling sites

Trentino - Alto Adige cover different environments ranging from forests to urban centers, from vineyards and apple orchards to glaciers.

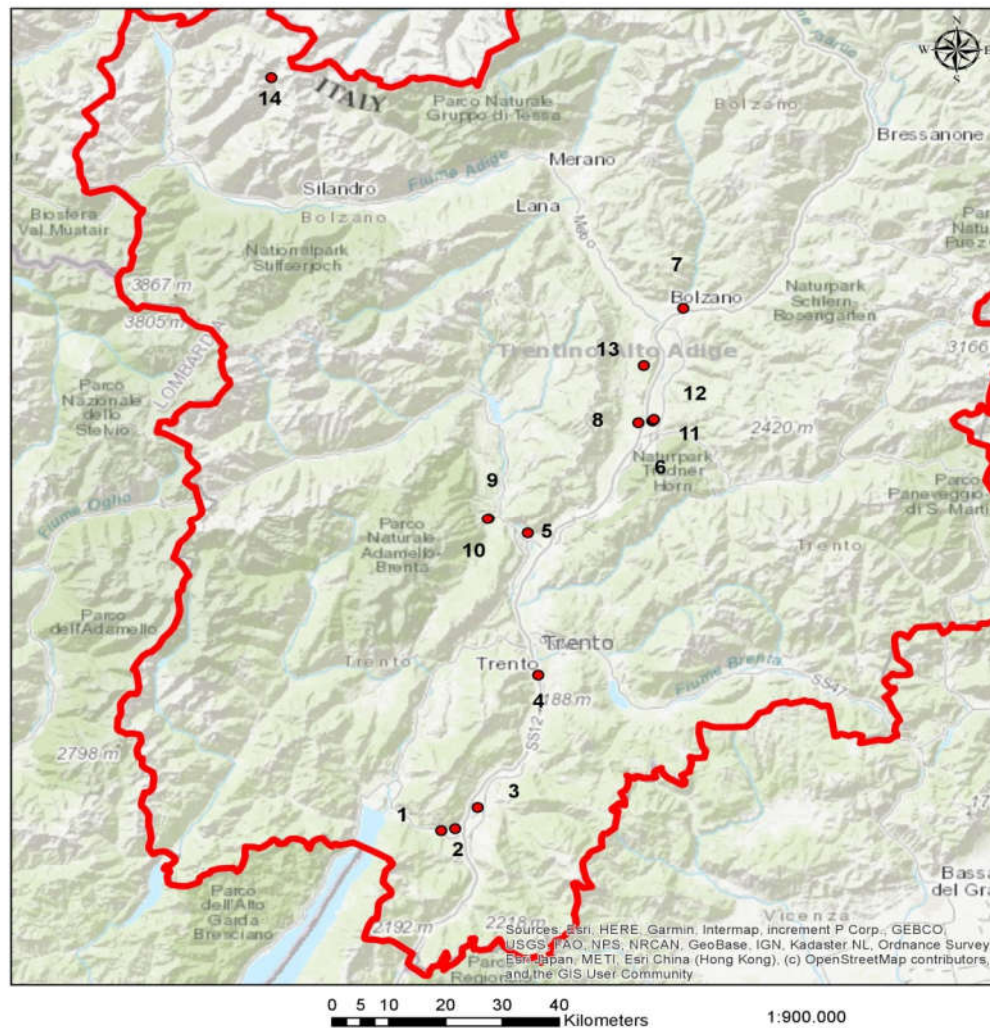

**Figure S1.** Gis map (1:900.000) of sampling sites (1-2:Mori/AGR1-MO, 3: Rovereto/RO, 4:Trento/TRE, 5: Mezzolombardo/ AGR2, 6: Ora-auer/AGR3, 7: Bolzano/ BO, 8: Caldaro-Kaltem/CA, 9-10: Sporminore/ME1-ME2, 11-12:Ora-auer/ME3-ME4, 13: Monticolo-Montiggli/MON1-MON2, 14: Val di Mazia-Matschertal/VAL) in Trentino-Alto Adige region.

### 1.1. Agricultural sampling sites:

1. Mori (AGR1): Sediments of a channel (Rio Cameras) that flows in the middle of an area characterized by vineyards. The samples were collected nearby a small cattle shed. The channel is natural, with the presence of grass and other spontaneous vegetation on the banks. The sediments are mainly composed by small size gravel and sand.
2. Mezzolombardo (AGR2): Sediments of a river (Noce) that flows in a valley (Val di Non) where apple orchards are enormously diffused. The sampling sites were at the end of the valley. This natural river shows banks covered by grass. The sediments are mainly formed by gravel.
3. Ora-Auer (AGR3): Sediments of a channel (Rio Lusina) that flows through vineyards and apple orchards, at the Adige Valley bottom. This natural channel shows banks covered by grass and spontaneous vegetation. Sediments are mainly formed by sand.
4. Sporminore (ME1/ME2): Soil samples collected in two apple orchards located in a valley (Val di Non) where the apple production represents the main activity. The soil samples were collected near the apple trees in a root-free zone.
5. Ora-Auer (ME3/ME4): Soil samples were collected in two apple orchards located in the valley (Adige Valley). The soil samples were collected under the apple trees in a root-free zone.
6. Caldaro-Kalern (CA): Soil samples were collected in an experimental apple orchard, located in the valley (Adige Valley). The samples collected from tree rhizosphere, interrow grass rhizosphere and root-free soil. Orchards were planted in 2001 with trees of the cultivar Fuji (grafted on M9 rootstock) on a soil previously hosting another apple planting. The orchard is managed following the guidelines of organic farming, has a permanent grass cover in the alley (1.8 m large), while the soil area underneath the trees (1.2 m large) is kept free from weeds by periodic mechanical tillage

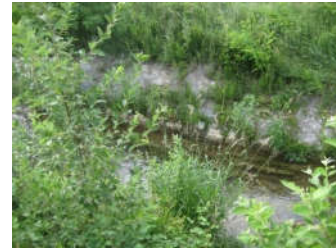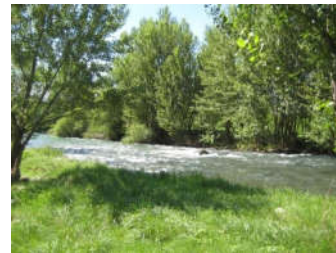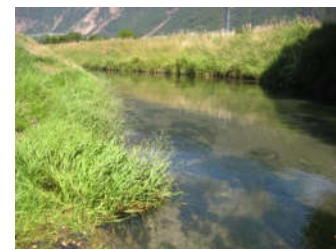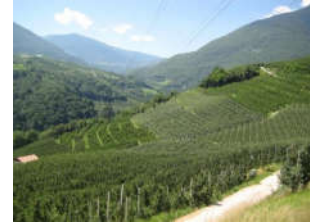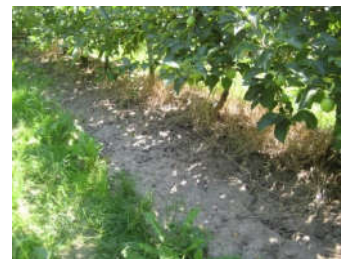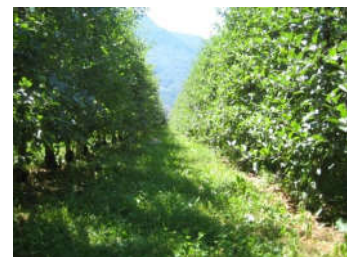

on the top soil layer. Each year approximately 600 Kg of an organic fertilizer (Nutrstart) were applied to the soil-stripe underneath the trees. The soil is classified as loamy and the pH is 7.3.

### 1.2. Urban sampling sites:

1. Mori (MO): sediments of a channel (Rio Cameras) that flows through the town of Mori (approximately 10,000 inhabitants). The sampling site was located at the end of the urban centre. The effluent of a small wastewater treatment plant, collecting wastewater from small villages located near Mori, have been known to be discharged into the Rio Cameras. The channel presents artificial banks, and the sediments were mostly sandy.
2. Rovereto (RO): Sediments of a stream (Leno) that flows inside the town of Rovereto (approximately 40,000 inhabitants). The sampling site was located at the end of the urban centre. A hospital is located at an approximate distance of 250 m from the stream. The banks are mainly artificial, with some areas covered by vegetation. Sediments mainly composed by gravel.
3. Trento (TRE): Sediments of a stream (Fersina) that crosses the city of Trento (approximately 100,000 inhabitants). The stream flows 400 meters from the city hospital. The sampling site was located immediately before the confluence between Fersina and Adige River, at the end of the city. Banks are mainly artificial, with some areas covered by vegetation. Sediment is composed by gravel and sand.
4. Bolzano (BO): Sediments of a stream (Talvera) that flows in the middle of the city (approximately 100,000 inhabitants). Banks are natural, and the sediment is sandy.

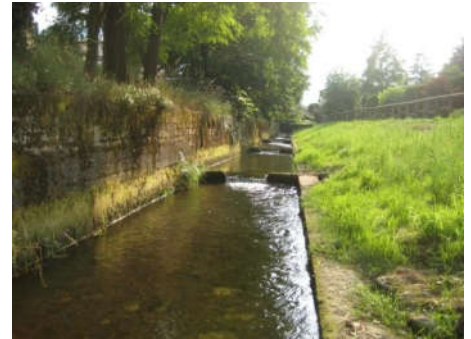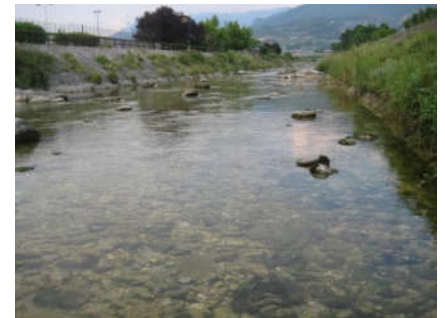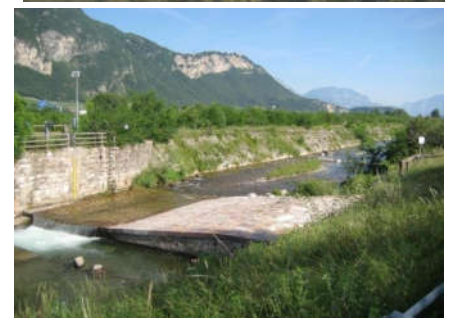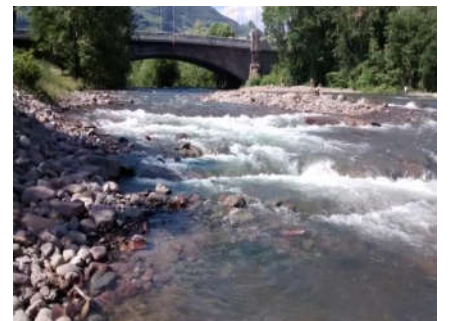

1.3. Forest sampling site:

1. Monticolo-Montiggl (MON1-MON2): Oak rhizosphere samples collected in different sites inside a managed forest nearby the lake of Monticolo. The sampling area was characterized by the presence of sessile oak (*Quercus petraea* Liebl). In addition fresh litter gathered during the fall season were analyzed.

**Glacial sediments:**

1. Val di Mazia-Matschertal (VAL): Mineral soil samples collected in a post glacial environment at 2,750 m a.s.l. The mineral soil was ice-free since 50 years.

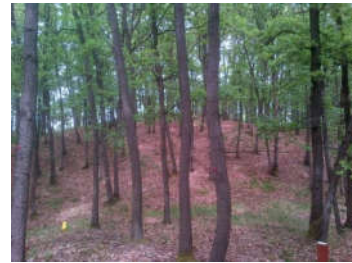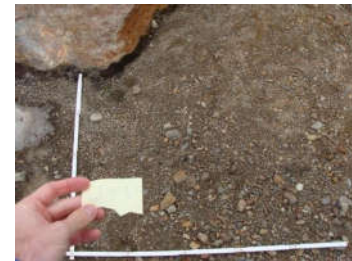

## 2. Results and Discussion

**Table S1.** Environmental studies investigating the correlation between class 1 integrons, antibiotic resistance genes and pollution (Year, References, Location, Detected genes in the study, Analysis used, Type of sample collected, Land use system of the investigated site and Findings showed). Citations references are reported below the table.

| Year | References          | Location    | Detected genes                                 | Analysis           | Type of sample             | Land use system                | Findings                                                                                                         |
|------|---------------------|-------------|------------------------------------------------|--------------------|----------------------------|--------------------------------|------------------------------------------------------------------------------------------------------------------|
| 2017 | Gillings [1]        | worldwide   | class 1 integrons                              | review             | not applicable             | not applicable                 | Class 1 integrons are spread via the selection pressures and pollutants arising out of human activity.           |
| 2017 | Zhu et al. [2]      | China       | 248 ARGs, 9 transposase genes, intl1, 16S rRNA | HT-qPCR            | sediment                   | estuarine wetlands             | Human activity influences the abundance and dissemination of ARGs                                                |
| 2016 | Koczura et al. [3]  | Poland      | intl1, sul1, sul2                              | qPCR               | water, sediment            | river, wwtp effluent discharge | The abundance of class 1 integrons in aquatic habitat is due to anthropogenic pressure and environmental factors |
| 2016 | Borruso et al. [4]  | China       | intl1, sul1                                    | PCR                | sediment                   | freshwater habitat             | Intl1 and gene cassettes depend on the pollution gradient                                                        |
| 2015 | Chen et al. [5]     | South China | intl1, sul1, sul2, sul3, qnrS, ermB            | PCR, qPCR          | water, sediment            | river catchment, estuary       | Integrons foster the dissemination of ARGs in human-impacted aquatic environments.                               |
| 2014 | Gillings et al. [6] | worldwide   | class 1 integrons                              | review             | not applicable             | not applicable                 | The relationship between anthropogenic impacts and the abundance of intl1 is examined                            |
| 2012 | Dealtry et al. [7]  | Belgium     | IncP-1 group, sul1, sul2, intl1, intl2, aadA   | PCR, Southern blot | biopurification system mix | farm system                    | Correlation between IncP plasmid abundance and pesticide impact                                                  |

|                  |                                    |                      |                                                                                                                |                                   |                                                                                                 |                         |                                                                                                               |  |
|------------------|------------------------------------|----------------------|----------------------------------------------------------------------------------------------------------------|-----------------------------------|-------------------------------------------------------------------------------------------------|-------------------------|---------------------------------------------------------------------------------------------------------------|--|
| 1<br>4           |                                    |                      |                                                                                                                | hybridization                     |                                                                                                 |                         |                                                                                                               |  |
| 2<br>0<br>1<br>4 | Jechalk<br>e et al.<br>[8]         | Ger<br>man<br>y      | intl1, intl2, qacE, qacEΔ 1                                                                                    | Southern<br>blot<br>hybridization | manure-treated/untreated soils,<br>rhizosphere, digestates, non-<br>farm biopurification system | farm<br>manuring        | Intl1 and other genes increase their<br>abundance                                                             |  |
| 2<br>0<br>1<br>3 | Cheng<br>et al. [9]                | Chi<br>na            | 10 tet genes, sul1, sul2, intl1                                                                                | qPCR                              | animal manures and<br>wastewater lagoon samples                                                 | manure,<br>wastewater   | Intl1 and other genes increase their<br>abundance due to animal manure                                        |  |
| 2<br>0<br>1<br>3 | Khan et<br>al. [10]                | Paki<br>stan         | intl1, tetA, sul1, dfrA1, ermB                                                                                 | qPCR                              | water                                                                                           | river<br>catchment      | Human impact increases Intl1 and other<br>gene                                                                |  |
| 2<br>0<br>1<br>2 | Drudge<br>et al.<br>[11]           | Can<br>ada           | aac(3)Ia, aadA1, sul2, tetA, tetC                                                                              | microarray                        | water, floc                                                                                     | freshwater<br>habitat   | Human impact increases Intl1 cassettes                                                                        |  |
| 2<br>0<br>1<br>1 | Heuer<br>et al.<br>[12]            | worl<br>dwi<br>de    | class 1 integrons                                                                                              | review                            | different animal manure stocks                                                                  | animal<br>husbandry     | Agricultural antibiotic use has a significant<br>effect on the spread of resistance in the<br>human community |  |
| 2<br>0<br>1<br>1 | La Para<br>et al.<br>[13]          | USA                  | tet(A), tet(X), tet(W), intl1, 16S<br>rRNA                                                                     | qPCR                              | Water, sediment                                                                                 | wastewater<br>treatment | The effluent shows a significative Intl1<br>abundance increase                                                |  |
| 2<br>0<br>1<br>0 | Storteb<br>oom et<br>al. [14]      | USA                  | tet(B), tet(C), tet(E), tet(H), tet(M),<br>tet(O), tetB(P), tet(Q), tet(S), tet(T),<br>tet(W), sul(I), sul(II) | PCR, RFLP                         | water                                                                                           | river                   | The transport of ARGs from specific<br>sources is likely the dominant mechanism<br>for ARG proliferation      |  |
| 2<br>0<br>1<br>0 | Byrne-<br>Bailey<br>et al.<br>[15] | Not<br>spec<br>ified | intl1, intl2                                                                                                   | qPCR                              | amended soil                                                                                    | farm<br>manuring        | Pig slurry-amended soil is<br>a reservoir of diverse bacterial species<br>carrying class 1 and 2 integrons    |  |
| 2<br>0           | McKinn<br>ey et al.<br>[16]        | USA                  | tet(O), tet(W), sul(I),sul(II)                                                                                 | qPCR                              | water                                                                                           | livestock<br>lagune     | The fate of ARGs in lagoons used to treat<br>animal waste is investigated                                     |  |

|   |           |       |                                                |                                |                                                                           |                      |                                                                                                             |
|---|-----------|-------|------------------------------------------------|--------------------------------|---------------------------------------------------------------------------|----------------------|-------------------------------------------------------------------------------------------------------------|
| 1 |           |       |                                                |                                |                                                                           |                      |                                                                                                             |
| 0 |           |       |                                                |                                |                                                                           |                      |                                                                                                             |
| 2 |           |       |                                                |                                |                                                                           |                      |                                                                                                             |
| 0 | Holzel    | Ger   | tet(M), tet(O), tet(B), SULs                   | qPCR                           | liquid pig manure                                                         | animal husbandry     | Antibiotic contamination of manure seems to be associated with a variety of changes in bacterial resistance |
| 0 | et al.    | man   |                                                |                                |                                                                           |                      |                                                                                                             |
| 9 | [17]      | y     |                                                |                                |                                                                           |                      |                                                                                                             |
| 2 |           |       |                                                |                                |                                                                           |                      |                                                                                                             |
| 0 | Binh et   | Ger   | aadA1, aadA2, aadA9, aadA11, aadA13            | PCR, cloning, RFLP, sequencing | manured/not manured soil, manure                                          | soil fertilization   | aadA genes localized on class 1 integrons are introduced via piggery manure into agricultural soils         |
| 0 | al. [18]  | man   |                                                |                                |                                                                           |                      |                                                                                                             |
| 9 |           | y     |                                                |                                |                                                                           |                      |                                                                                                             |
| 2 |           |       |                                                |                                |                                                                           |                      |                                                                                                             |
| 0 | Zhang     | Chi   | intl1, tetA, tetC                              | PCR, qPCR                      | water, sediment                                                           | wastewater treatment | Intl1 grows in abundance downstream from city                                                               |
| 0 | et al.    | na    |                                                |                                |                                                                           |                      |                                                                                                             |
| 9 | [19]      |       |                                                |                                |                                                                           |                      |                                                                                                             |
| 2 |           |       |                                                |                                |                                                                           |                      |                                                                                                             |
| 0 | Martine   | worl  | antibiotic resistance genes                    | review                         | review                                                                    | review               | Shows the resistance pathogen acquisition system and the consequences in the environment                    |
| 0 | z et al.  | dwi   |                                                |                                |                                                                           |                      |                                                                                                             |
| 9 | [20]      | de    |                                                |                                |                                                                           |                      |                                                                                                             |
| 2 |           |       |                                                |                                |                                                                           |                      |                                                                                                             |
| 0 | Hardwi    | Aust  | intl1, 16S rRNA                                | qPCR                           | sediment                                                                  | stream chatchment    | Human impact promotes Intl1 abundance                                                                       |
| 0 | ck et al. | ralia |                                                |                                |                                                                           |                      |                                                                                                             |
| 8 | [21]      |       |                                                |                                |                                                                           |                      |                                                                                                             |
| 2 |           |       |                                                |                                |                                                                           |                      |                                                                                                             |
| 0 | Binh et   | Ger   | 81 plasmids, bla-TEM, sul1, sul2, sul3         | PCR, qPCR, hybridization       | animal manures                                                            | manure storage tanks | Piggery manure is a reservoir of broad-host range plasmids conferring multiple antibiotic resistance genes  |
| 0 | al. [22]  | man   |                                                |                                |                                                                           |                      |                                                                                                             |
| 8 |           | y     |                                                |                                |                                                                           |                      |                                                                                                             |
| 2 |           |       |                                                |                                |                                                                           |                      |                                                                                                             |
| 0 | Byrne-    | UK    | sul1, sul2, sul3, intl1, intl2, qacE, qacEΔ 1  | PCR, sequencing                | manured soils, slurry                                                     | farm manuring        | Sulfonamide resistance in <i>Psychrobacter</i> , <i>Enterococcus</i> , and <i>Bacillus</i> spp. is reported |
| 0 | Bailey    |       |                                                |                                |                                                                           |                      |                                                                                                             |
| 8 | et al.    |       |                                                |                                |                                                                           |                      |                                                                                                             |
| 8 | [23]      |       |                                                |                                |                                                                           |                      |                                                                                                             |
| 2 |           |       |                                                |                                |                                                                           |                      |                                                                                                             |
| 0 | Heuer     | Not   | sul1, sul2, sul3                               | PCR, hybridization             | animal manure, manured soil with and without the addition of sulfadiazine | soil microcosms      | Manure from treated pigs enhances the spread of antibiotic resistances in soil bacterial communities        |
| 0 | et al.    | spec  |                                                |                                |                                                                           |                      |                                                                                                             |
| 7 | [24]      | ified |                                                |                                |                                                                           |                      |                                                                                                             |
| 2 |           |       |                                                |                                |                                                                           |                      |                                                                                                             |
| 0 | Peak et   | USA   | tet(O), tet(Q), tet(W), tet(M), tet(B), tet(L) | qPCR                           | water                                                                     | feedlot lagune       | Antibiotics influence the abundance and seasonal distribution of resistance genes in associated lagoons     |
| 0 | al. [25]  |       |                                                |                                |                                                                           |                      |                                                                                                             |
| 7 |           |       |                                                |                                |                                                                           |                      |                                                                                                             |

|   |                      |               |                                                                                                                 |               |                |                                     |                                                                                                                         |
|---|----------------------|---------------|-----------------------------------------------------------------------------------------------------------------|---------------|----------------|-------------------------------------|-------------------------------------------------------------------------------------------------------------------------|
| 2 | Ghosh and la         | USA           | tet(A), tet(B), tet(C), tet(D), tet(E), tet(G), tet(K), tet(L), tetA(P), tet(M), tet(O), tet(S), tet(Q), tet(X) | Multiplex PCR | soil           | farm manuring                       | Excessive application of animal manure leads to the spread of resistance to soil bacteria                               |
| 0 | Para [26]            |               |                                                                                                                 |               |                |                                     |                                                                                                                         |
| 2 | Koike et al. [27]    | Not specified | tet(M), tet(O), tet(Q), tet(W), tet(C), tet(H), tet(Z)                                                          | qPCR          | water          | lagoon, groundwater, swine manuring | Antibiotic resistance genes in groundwater depended on swine manure, but they are also part of the indigenous gene pool |
| 0 | Bouche r et al. [28] | worl dwi de   | integrans                                                                                                       | review        | not applicable | not applicable                      | The diversity and the evolution of integrans are showed                                                                 |

- Gillings, M. R. Class 1 integrons as invasive species. *Curr. Opin. Microbiol.* **2017**, *38*, 10-15.
- Zhu, Y.G.; Zhao, Y.; Li, B.; Huang, C.L.; Zhang, S. Y.; Yu, S.; et al. Continental-scale pollution of estuaries with antibiotic resistance genes. *Nat. Microbiol.* **2017**, *2*(4), 16270.
- Koczura, R.; Mokracka, J.; Taraszewska, A.; Łopacinska, N. Abundance of class 1 integron-integrase and sulfonamide resistance genes in river water and sediment is affected by anthropogenic pressure and environmental factors. *Microb. Ecol.* **2016**, *72*(4), 909-916.
- Borruso, L.; Harms, K.; Johnsen, P.J.; Nielsen, K.M.; Brusetti, L. Distribution of class 1 integrons in a highly impacted catchment. *Sci. Total Environ.* **2016**, *566*, 1588-1594
- Chen, B.; Liang, X. ; Nie, X. ; Huang, X. ;Zou, S. ; Li, X. The role of class I integrons in the dissemination of sulfonamide resistance genes in the Pearl River and Pearl River Estuary, South China. *J. Hazard. Mater.* **2015**, *282*, 61-67.
- Gillings, M.R. Integrons: Past, Present, and Future. *Microbiol. Mol. Biol. Rev.* **2014**, *78*, 257-277
- Dealtry, S.; Holmsgaard, P.N.; Dunon, V.; Jechalke, S.; Ding, G.C.; Krögerrecklenfort, E.; Smalla, K. Shifts in abundance and diversity of mobile genetic elements after the introduction of diverse pesticides into an on-farm biopurification system over the course of a year. *Appl. Env. Microb.* **2014**, *80*, 4012-4020
- Jechalke, S.; Schreiter, S.; Wolters, B.; Dealtry, S.; Heuer, H.; Smalla, K. Widespread dissemination of class 1 integron components in soils and related ecosystems as revealed by cultivation-independent analysis. *Front. Microbiol.* **2014**, *4*, 420.
- Cheng, W.; Chen, H.; Su, C.; Yan, S. Abundance and persistence of antibiotic resistance genes in livestock farms: A comprehensive investigation in Eastern China. *Environ. Int.* **2013**, *61*, 1-7
- Khan, G.A.; Berglund, B.; Khan, K.M.; Lindgren, P-E.; Fick, J. Occurrence and abundance of antibiotics and resistance genes in rivers, canal and near drug formulation facilities—a study in Pakistan. *PLoS One.* **2013**, *8*, e62712.
- Drudge, C.N.; Elliott, A.V.C.; Plach, J.M.; Ejim, L.J.; Wright, G.D.; Droppo, I.G. et al. Diversity of integron- and culture-associated antibiotic resistance genes in freshwater floc. *Appl. Environ. Microbiol.* **2012**, *78*, 4367-4372.
- Heuer, H.; Schmitt, H. ; Smalla, K. Antibiotic resistance gene spread due to manure application on agricultural fields. *Curr. Opin. Microbiol.* **2011**, *14*(3), 236-243.
- LaPara ;T.M.; Burch, T.R.; McNamara, P.J.; Tan, D.T.; Yan, M.; Eichmiller, J.J. Tertiary-treated municipal wastewater is a significant point source of antibiotic resistance genes into Duluth-Superior Harbor. *Environ. Sci. Technol.* **2011**, *45*, 9543-9549.
- Storteboom, H.; Arabi, M.; Davis, J. G.; Crimi, B.; Pruden, A. Tracking antibiotic resistance genes in the South Platte River basin using molecular signatures of urban, agricultural, and pristine sources. *Environ. Sci. Technol.* **2010**, *44*(19), 7397-7404.



15. Byrne-Bailey, K. G.; Gaze, W. H.; Zhang, L.; Kay, P.; Boxall, A.; Hawkey, P. M.; Wellington, E. M. H. Integron prevalence and diversity in manured soil. *Appl. Environ. Microbiol.* **2011**, *77*(2), 684-687.
16. McKinney, C. W., Loftin, K. A., Meyer, M. T., Davis, J. G., & Pruden, A. Tet and sul antibiotic resistance genes in livestock lagoons of various operation type, configuration, and antibiotic occurrence. *Environ. Sci. Technol.* **2010**, *44*(16), 6102-6109.
17. Hölzel, C. S.; Harms, K. S.; Küchenhoff, H.; Kunz, A.; Müller, C.; Meyer, K. et al. Phenotypic and genotypic bacterial antimicrobial resistance in liquid pig manure is variously associated with contents of tetracyclines and sulfonamides. *J. Appl. Microbiol.* **2010**, *108*(5), 1642-1656.
18. Binh, C. T.; Heuer, H.; Kaupenjohann, M.; Smalla, K. Diverse aadA gene cassettes on class 1 integrons introduced into soil via spread manure. *Res. Microbiol.* **2009**, *160*(6), 427-433.
19. Zhang, X.; Wu, B.; Zhang, Y.; Zhang, T.; Yang, L.; Fang, H. et al. Class 1 integronase gene and tetracycline resistance genes *tetA* and *tetC* in different water environments of Jiangsu Province, China. *Ecotoxicol.* **2009**, *18*, 652-660.
20. Martinez, J. L. The role of natural environments in the evolution of resistance traits in pathogenic bacteria. *P Roy. Soc. B-Biol. Sci.* **2009**, *276*(1667), 2521-2530.
21. Hardwick, S.A.; Stokes, H.W.; Findlay, S.; Taylor, M.; Gillings, M.R. Quantification of class 1 integron abundance in natural environments using real-time quantitative PCR. *FEMS Microbiol. Lett.* **2008**, *278*, 207-212.
22. Binh, C. T. T.; Heuer, H.; Kaupenjohann, M.; Smalla, K. Piggery manure used for soil fertilization is a reservoir for transferable antibiotic resistance plasmids. *FEMS Microbiol. Ecol.* **2008**, *66*(1), 25-37.
23. Byrne-Bailey, K. G.; Gaze, W. H.; Kay, P.; Boxall, A. B. A.; Hawkey, P. M.; Wellington, E. M. H. Prevalence of sulfonamide resistance genes in bacterial isolates from manured agricultural soils and pig slurry in the United Kingdom. *Antimicrob. Agents Chemother.* **2009**, *53*(2), 696-702.
24. Heuer, H.; Smalla, K. Manure and sulfadiazine synergistically increased bacterial antibiotic resistance in soil over at least two months. *Environ. Microbiol.* **2007**, *9*(3), 657-666.
25. Peak, N.; Knapp, C. W.; Yang, R. K.; Hanfelt, M. M.; Smith, M. S.; Aga, D. S. et al. Abundance of six tetracycline resistance genes in wastewater lagoons at cattle feedlots with different antibiotic use strategies. *Environ. Microbiol.* **2007**, *9*(1), 143-151.
26. Koike, S.; Krapac, I. G.; Oliver, H. D.; Yannarell, A. C.; Chee-Sanford, J. C.; Aminov, R. I. et al. Monitoring and Source Tracking of Production Facilities over a 3-Year Period and Groundwater Adjacent to Swine Tetracycline Resistance Genes in Lagoons. *Appl. Environ. Microbiol.* **2007**, *73*(15):4813.
27. Ghosh, S.; LaPara, T. M. The effects of subtherapeutic antibiotic use in farm animals on the proliferation and persistence of antibiotic resistance among soil bacteria. *The ISME J.* **2007**, *1*(3), 191-203.
28. Boucher, Y.; Labbate, M.; Koenig, J.E.; Stokes, H.W. Integrons: mobilizable platforms that promote genetic diversity in bacteria. *Trends Microbiol.* **2007**, *15*, 301-309

Supplementary results

**Table S2.** *Int11* PCR amplification results from samples collected from sediments within vineyard and apple orchard agricultural sites. Site, Matrix, *Int11* number of bands and their intensity (*Int11* n. of bands -0 bands, 1 band, 2 bands, 3 bands ) obtained. (+ = low intensity; ++ = medium intensity; +++ = high intensity; n.a. = not applicable; - = not detected).

| Site                        | Matrix    | Sample name | <i>Int11</i> N. of bands |       |   |   |   |
|-----------------------------|-----------|-------------|--------------------------|-------|---|---|---|
|                             |           |             | 0                        | 1     | 2 | 3 | 4 |
| Mori (Channel Cameras)      | sediments | AG1 A       | 1                        | -     | - | - | - |
| Mori (Channel Cameras)      | sediments | AG1 B       | 1                        | -     | - | - | - |
| Mori (Channel Cameras)      | sediments | AG1 C       | -                        | 1(++) | - | - | - |
| Mori (Channel Cameras)      | sediments | AG1 D       | -                        | 1(++) | - | - | - |
| Mezzolombardo (River Noce)  | sediments | AG2 A       | -                        | 1(+)  | - | - | - |
| Mezzolombardo (River Noce)  | sediments | AG2 B       | 1                        | -     | - | - | - |
| Mezzolombardo (River Noce)  | sediments | AG2 C       | 1                        | -     | - | - | - |
| Ora - Auer (Channel Lusina) | sediments | AG3 A       | 1                        | -     | - | - | - |
| Ora - Auer (Channel Lusina) | sediments | AG3 B       | -                        | 1(+)  | - | - | - |
| Ora - Auer (Channel Lusina) | sediments | AG3 C       | 1                        | -     | - | - | - |

**Table S3.** *Int11* PCR amplification results from samples collected from grass rhizosphere, tree rhizosphere and root-free soil within vineyard and apple orchard agricultural sites. Site, Matrix, *Int11* number of bands and their intensity (*Int11* n. of bands -0 bands, 1 band, 2 bands, 3 bands ) obtained. (+ = low intensity; ++ = medium intensity; +++ = high intensity; n.a. = not applicable; - = not detected).

| Site              | Matrix            | Sample    | <i>Int11</i> N. of bands |      |      |      |   |
|-------------------|-------------------|-----------|--------------------------|------|------|------|---|
|                   |                   |           | 0                        | 1    | 2    | 3    | 4 |
| Caldaro - Kaltern | Grass Rhizosphere | 2G2 ka112 | 1                        | -    | -    | -    | - |
| Caldaro - Kaltern | Grass Rhizosphere | 4G1       | 1                        | -    | -    | -    | - |
| Caldaro - Kaltern | Soil              | 3S2 ka112 | 1                        | -    | -    | -    | - |
| Caldaro - Kaltern | Soil              | 1S1 ka112 | 1                        | -    | -    | -    | - |
| Caldaro - Kaltern | Soil              | 2S1       | 1                        | -    | -    | -    | - |
| Caldaro - Kaltern | Tree Rhizosphere  | 2T2 ka112 | 1                        | -    | -    | -    | - |
| Caldaro - Kaltern | Soil              | 2S2 ka112 | 1                        | -    | -    | -    | - |
| Caldaro - Kaltern | Tree Rhizosphere  | 3T2 ka113 | 1                        | -    | -    | -    | - |
| Caldaro - Kaltern | Grass Rhizosphere | 5G2 ka112 | 1                        | -    | -    | -    | - |
| Caldaro - Kaltern | Soil              | 6S1 ka112 | 1                        | -    | -    | -    | - |
| Caldaro - Kaltern | Soil              | 4S2 ka112 | 1                        | -    | -    | -    | - |
| Caldaro - Kaltern | Tree Rhizosphere  | 1T1 ka112 | 1                        | -    | -    | -    | - |
| Caldaro - Kaltern | Grass Rhizosphere | 4G2 ka111 | 1                        | -    | -    | -    | - |
| Caldaro - Kaltern | Tree Rhizosphere  | 3T2 ka112 | 1                        | -    | -    | -    | - |
| Caldaro - Kaltern | Soil              | 6S1 ka113 | 1                        | -    | -    | -    | - |
| Caldaro - Kaltern | Grass Rhizosphere | 4G1 ka112 | 1                        | -    | -    | -    | - |
| Caldaro - Kaltern | Grass Rhizosphere | 6G2       | 1                        | -    | -    | -    | - |
| Caldaro - Kaltern | Grass Rhizosphere | 3G2       | 1                        | -    | -    | -    | - |
| Caldaro - Kaltern | Tree Rhizosphere  | 2T1 ka112 | 1                        | -    | -    | -    | - |
| Caldaro - Kaltern | Grass Rhizosphere | 6G1 ka113 | 1                        | -    | -    | -    | - |
| Caldaro - Kaltern | Soil              | 2S1 ka112 | 1                        | -    | -    | -    | - |
| Caldaro - Kaltern | Grass Rhizosphere | 1G2 ka111 | 1                        | -    | -    | -    | - |
| Caldaro - Kaltern | Grass Rhizosphere | 6G2 ka111 | 1                        | -    | -    | -    | - |
| Caldaro - Kaltern | Grass Rhizosphere | 4G2 ka113 | 1                        | -    | -    | -    | - |
| Caldaro - Kaltern | Grass Rhizosphere | 4G1 ka113 | 1                        | -    | -    | -    | - |
| Caldaro - Kaltern | Grass Rhizosphere | 5G2 ka111 | 1                        | -    | -    | -    | - |
| Caldaro - Kaltern | Grass Rhizosphere | 2G1 ka111 | 1                        | -    | -    | -    | - |
| Caldaro - Kaltern | Soil              | 5S1 ka113 | 1                        | -    | -    | -    | - |
| Caldaro - Kaltern | Grass Rhizosphere | 3G1 ka111 | 1                        | -    | -    | -    | - |
| Caldaro - Kaltern | Grass Rhizosphere | 3G1 ka113 | 1                        | -    | -    | -    | - |
| Caldaro - Kaltern | Tree Rhizosphere  | 4T2 ka113 | 1                        | -    | -    | -    | - |
| Caldaro - Kaltern | Grass Rhizosphere | 2G2 ka111 | 1                        | -    | -    | -    | - |
| Caldaro - Kaltern | Grass Rhizosphere | 5G1 ka111 | 1                        | -    | -    | -    | - |
| Caldaro - Kaltern | Soil              | 4S1 ka111 | 1                        | -    | -    | -    | - |
| Caldaro - Kaltern | Tree Rhizosphere  | 6T2 ka113 | 1                        | -    | -    | -    | - |
| Val di Non        | Soil              | ME1 A     | -                        | 1    | -    | -    | - |
| Val di Non        | Soil              | ME1 B     | -                        | 1(+) | -    | -    | - |
| Val di Non        | Soil              | ME1 C     | 1                        | -    | -    | -    | - |
| Val di Non        | Soil              | ME2 A     | -                        | -    | -    | 1(+) | - |
| Val di Non        | Soil              | ME2 B     | 1                        | -    | -    | -    | - |
| Val di Non        | Soil              | ME2 C     | 1                        | -    | -    | -    | - |
| Ora - Auer        | Soil              | ME3 A     | -                        | 1(+) | -    | -    | - |
| Ora - Auer        | Soil              | ME3 B     | -                        | 1    | -    | -    | - |
| Ora - Auer        | Soil              | ME3 C     | -                        | -    | 1(+) | -    | - |
| Ora - Auer        | Soil              | ME4 A     | 1                        | -    | -    | -    | - |
| Ora - Auer        | Soil              | ME4 B     | 1                        | -    | -    | -    | - |
| Ora - Auer        | Soil              | ME4 C     | 1                        | -    | -    | -    | - |

**Table S4.** *Int11* PCR amplification results from samples collected from stream or river sediments within urban sites. Site, Matrix, *Int11* number of bands and their intensity (*Int11* n. of bands -0 bands, 1 band, 2 bands, 3 bands ) obtained. (+ = low intensity; ++ = medium intensity; +++ = high intensity; n.a. = not applicable; - = not detected).

| Site                           | Matrix    | Sample | <i>Int11</i> N. of bands |        |   |   |   |
|--------------------------------|-----------|--------|--------------------------|--------|---|---|---|
|                                |           |        | 0                        | 1      | 2 | 3 | 4 |
| <b>Mori (Channel Cameras)</b>  | sediments | MO A   | -                        | 1(++)  | - | - | - |
| <b>Mori (Channel Cameras)</b>  | sediments | MO B   | -                        | 1(+++) | - | - | - |
| <b>Mori (Channel Cameras)</b>  | sediments | MO C   | -                        | 1(++)  | - | - | - |
| <b>Mori (Channel Cameras)</b>  | sediments | MO D   | -                        | 1(++)  | - | - | - |
| <b>Rovereto (River Leno)</b>   | sediments | RO A   | 1                        | -      | - | - | - |
| <b>Rovereto (River Leno)</b>   | sediments | RO B   | 1                        | -      | - | - | - |
| <b>Rovereto (River Leno)</b>   | sediments | RO C   | 1                        | -      | - | - | - |
| <b>Rovereto (River Leno)</b>   | sediments | RO D   | -                        | 1(+)   | - | - | - |
| <b>Trento (River Fersina)</b>  | sediments | TR A   | 1                        | -      | - | - | - |
| <b>Trento (River Fersina)</b>  | sediments | TR B   | 1                        | -      | - | - | - |
| <b>Trento (River Fersina)</b>  | sediments | TR C   | -                        | 1(+)   | - | - | - |
| <b>Bolzano (River Talvera)</b> | sediments | BZ A   | 1                        | -      | - | - | - |
| <b>Bolzano (River Talvera)</b> | sediments | BZ B   | 1                        | -      | - | - | - |
| <b>Bolzano (River Talvera)</b> | sediments | BZ C   | -                        | -      | - | - | - |

**Table S5.** *Int11* PCR amplification results from samples collected from soil and litter within the Monticolo-Montiggli forest site. Site, Matrix, *Int11* number of bands and their intensity (*Int11* n. of bands -0 bands, 1 band, 2 bands, 3 bands ) obtained. (+ = low intensity; ++ = medium intensity; +++ = high intensity; n.a. = not applicable; - = not detected).

| Site                | Matrix      | Sample   | <i>Int11</i> N. of bands |      |      |   |   |
|---------------------|-------------|----------|--------------------------|------|------|---|---|
|                     |             |          | 0                        | 1    | 2    | 3 | 4 |
| Monticolo-Montiggli | Rhizosphere | 41SA     | -                        | 1(+) | -    | - | - |
| Monticolo-Montiggli | Rhizosphere | 03140NEB | 1                        | -    | -    | - | - |
| Monticolo-Montiggli | Rhizosphere | 03140SC  | 1                        | -    | -    | - | - |
| Monticolo-Montiggli | Rhizosphere | 03122NEA | 1                        | -    | -    | - | - |
| Monticolo-Montiggli | Rhizosphere | 03122NEC | 1                        | -    | -    | - | - |
| Monticolo-Montiggli | Rhizosphere | 03122SC  | -                        | 1    | -    | - | - |
| Monticolo-Montiggli | Rhizosphere | 03140 SA | -                        | 1    | -    | - | - |
| Monticolo-Montiggli | Rhizosphere | 03140NOA | -                        | 1    | -    | - | - |
| Monticolo-Montiggli | Rhizosphere | 03122NOA | -                        | 1    | -    | - | - |
| Monticolo-Montiggli | Rhizosphere | 03122SB  | -                        | 1    | -    | - | - |
| Monticolo-Montiggli | Rhizosphere | 3155SA   | -                        | 1(+) | -    | - | - |
| Monticolo-Montiggli | Rhizosphere | 03155NEB | -                        | 1    | -    | - | - |
| Monticolo-Montiggli | Rhizosphere | 03118NOB | -                        | -    | 1(+) | - | - |
| Monticolo-Montiggli | Rhizosphere | 03118NOA | -                        | 1(+) | -    | - | - |
| Monticolo-Montiggli | Rhizosphere | 03118NEB | -                        | 1(+) | -    | - | - |
| Monticolo-Montiggli | Rhizosphere | 03122SA  | 1                        | -    | -    | - | - |
| Monticolo-Montiggli | Rhizosphere | 03122NEB | 1                        | -    | -    | - | - |
| Monticolo-Montiggli | Rhizosphere | 03122NOC | 1                        | -    | -    | - | - |
| Monticolo-Montiggli | Rhizosphere | 03140NEC | 1                        | -    | -    | - | - |
| Monticolo-Montiggli | Rhizosphere | 03118NEA | 1                        | -    | -    | - | - |
| Monticolo-Montiggli | Rhizosphere | 03141NOB | 1                        | -    | -    | - | - |
| Monticolo-Montiggli | Rhizosphere | 03122NOB | 1                        | -    | -    | - | - |
| Monticolo-Montiggli | Rhizosphere | 03118SB  | 1                        | -    | -    | - | - |
| Monticolo-Montiggli | Rhizosphere | 03141NOA | -                        | -    | 1(+) | - | - |
| Monticolo-Montiggli | Rhizosphere | 03140NEA | 1                        | -    | -    | - | - |
| Monticolo-Montiggli | Rhizosphere | 03140NOB | 1                        | -    | -    | - | - |

**Table S6.** *Int11* PCR amplification results from samples collected in mineral soils from Val di Mazia-Matschertal glacier moraine. Site, Matrix, *Int11* number of bands and their intensity (*Int11* n. of bands -0 bands, 1 band, 2 bands, 3 bands ) obtained. (+ = low intensity; ++ = medium intensity; +++ = high intensity; n.a. = not applicable; - = not detected).

| Site                     | Matrix       | Sample  | <i>Int11</i> N. of bands |      |   |   |   |
|--------------------------|--------------|---------|--------------------------|------|---|---|---|
|                          |              |         | 0                        | 1    | 2 | 3 | 4 |
| Val di Mazia-Matschertal | Mineral Soil | 63      | 1                        | -    | - | - | - |
| Val di Mazia-Matschertal | Mineral Soil | 109     | 1                        | -    | - | - | - |
| Val di Mazia-Matschertal | Mineral Soil | 60      | 1                        | -    | - | - | - |
| Val di Mazia-Matschertal | Mineral Soil | 64      | 1                        | -    | - | - | - |
| Val di Mazia-Matschertal | Mineral Soil | 20      | 1                        | -    | - | - | - |
| Val di Mazia-Matschertal | Mineral Soil | 105     | 1                        | -    | - | - | - |
| Val di Mazia-Matschertal | Mineral Soil | 148     | 1                        | -    | - | - | - |
| Val di Mazia-Matschertal | Mineral Soil | 151     | 1                        | -    | - | - | - |
| Val di Mazia-Matschertal | Mineral Soil | 53      | -                        | 1(+) | - | - | - |
| Val di Mazia-Matschertal | Mineral Soil | 153     | 1                        | -    | - | - | - |
| Val di Mazia-Matschertal | Mineral Soil | 156     | 1                        | -    | - | - | - |
| Val di Mazia-Matschertal | Mineral Soil | 159     | 1                        | -    | - | - | - |
| Val di Mazia-Matschertal | Mineral Soil | 166     | 1                        | -    | - | - | - |
| Val di Mazia-Matschertal | Mineral Soil | 168     | 1                        | -    | - | - | - |
| Val di Mazia-Matschertal | Mineral Soil | 172     | 1                        | -    | - | - | - |
| Val di Mazia-Matschertal | Mineral Soil | 175     | 1                        | -    | - | - | - |
| Val di Mazia-Matschertal | Mineral Soil | 173     | 1                        | -    | - | - | - |
| Val di Mazia-Matschertal | Mineral Soil | 23      | 1                        | -    | - | - | - |
| Val di Mazia-Matschertal | Mineral Soil | T0 95C  | 1                        | -    | - | - | - |
| Val di Mazia-Matschertal | Mineral Soil | T0 89B  | 1                        | -    | - | - | - |
| Val di Mazia-Matschertal | Mineral Soil | T0 90C  | 1                        | -    | - | - | - |
| Val di Mazia-Matschertal | Mineral Soil | PS101DJ | -                        | 1(+) | - | - | - |
| Val di Mazia-Matschertal | Mineral Soil | PS105DJ | -                        | 1(+) | - | - | - |
| Val di Mazia-Matschertal | Mineral Soil | PS103DJ | -                        | 1(+) | - | - | - |
| Val di Mazia-Matschertal | Mineral Soil | PS201DJ | 1                        | -    | - | - | - |
| Val di Mazia-Matschertal | Mineral Soil | PS202DJ | 1                        | -    | - | - | - |
| Val di Mazia-Matschertal | Mineral Soil | PS205DJ | 1                        | -    | - | - | - |
| Val di Mazia-Matschertal | Mineral Soil | PS201DO | 1                        | -    | - | - | - |
| Val di Mazia-Matschertal | Mineral Soil | PS202DO | 1                        | -    | - | - | - |
| Val di Mazia-Matschertal | Mineral Soil | PS205DO | 1                        | -    | - | - | - |
| Val di Mazia-Matschertal | Mineral Soil | PS303DJ | 1                        | -    | - | - | - |
| Val di Mazia-Matschertal | Mineral Soil | PS305DJ | 1                        | -    | - | - | - |
| Val di Mazia-Matschertal | Mineral Soil | PS306DJ | 1                        | -    | - | - | - |
| Val di Mazia-Matschertal | Mineral Soil | PS303DO | 1                        | -    | - | - | - |
| Val di Mazia-Matschertal | Mineral Soil | PS305DO | 1                        | -    | - | - | - |
| Val di Mazia-Matschertal | Mineral Soil | PS306DO | 1                        | -    | - | - | - |
